# Supplementary material for: The role of the state government, civil society and programmes across sectors in stunting reduction in Chhattisgarh, India, 2006–2016
Source: PubMed Central journal article supplement (PMC7342433; doi:10.1136/bmjgh-2019-002274), 2020-07-06
Supplement: bmjgh-2019-002274supp001.pdf [file bmjgh-2019-002274supp001.pdf]

**Supplemental Table 1A. Stakeholder interview key questions**


---

What do you think has changed in Chhattisgarh in the last 15 years since its inception in 2000? Do you think the lives of people have improved? How do you think that the lives of people were affected? In what ways? [Probe for what it was like when they were there]

---



---

What do you think has changed in the nutrition landscape since 2000 (*Refer to the timeline and at the end ask for feedback on the timeline*)

---



---

How has the engagement of different stakeholders such as government, civil society organizations, NGOs and Development Partners changed in the state over the years? And how has that worked for nutrition in the state?

---



---

What has been the government's role in enabling these changes that have taken place in the state? Can the changes be attributed to any specific actions taken by the government?

---



---

What do you think about the unique social fabric of Chhattisgarh (the tribal population and naxal history)- has that changed over the years and how does that relate to the above-mentioned changes?

---

**Supplemental Table 1B. Stakeholder interview analysis code list**

| Category                  | Code List                                                                                                                                                                        |
|---------------------------|----------------------------------------------------------------------------------------------------------------------------------------------------------------------------------|
| Program information       | ICDS, NRHM/NHM, PDS, NREGA                                                                                                                                                       |
| State government factors  | Creation of a new state; political leadership; political stability; other political push/factors; bureaucratic leadership; other bureaucratic push/factors, state led innovation |
| Other stakeholder factors | Central government, Civil Society/NGOs presence/academia, individual champions, development partner presence                                                                     |
| Facilitators              | Evaluations/assessments/data, infrastructure, technology, camaraderie across stakeholders, financial factors                                                                     |
| Impediments               | High burden of IMR, mining, neglect of remote areas, Naxalism                                                                                                                    |

Notes: ICDS-Integrated Child Development Services; NRHM – National Rural Health Mission; NHM – National Health Mission; PDS – Public Distribution System; NREGA – National Rural Employment Guarantee Act

**Supplemental Table 1C. Framework for analysis: Key elements for scaling up impact on nutrition (Gillespie et al 2015)**

| Element                      | Description                                                                                                                                                               |
|------------------------------|---------------------------------------------------------------------------------------------------------------------------------------------------------------------------|
| Vision/goal                  | A clear idea of what the impact would look like, accompanied by appropriate metrics and a compelling narrative that shows why it is important and how it can be achieved. |
| What is being scaled?        | A particular intervention that is to be scaled, whether it is technology, a process, a project, innovation, and/or methodology.                                           |
| Context/enabling environment | Policy/political context, implementation context such as the dedication of staff and household/community context such as social environment                               |

---

|                                                     |                                                                                                                                                                                                                                                                      |
|-----------------------------------------------------|----------------------------------------------------------------------------------------------------------------------------------------------------------------------------------------------------------------------------------------------------------------------|
| Drivers and barriers                                | The role of stakeholders, leaders, or champions; national and local ownership, commitment creation through use of data, advocacy coalitions, and external pressures                                                                                                  |
| Scaling-up strategy, processes, pathways            | The type of pathways and processes considered to be appropriate, depending on the need, context, and intervention being scaled up. These include expansion of program size, type of activities, organizational strength and capacity and increase in political power |
| Capacity                                            | Capacity of individuals and single organizations, systemic capacity for strategic and operational purposes.                                                                                                                                                          |
| Governance                                          | Horizontal (cross-sectoral) and vertical (national to community) coherence, anticipating and resolving trade-offs, and commitment.                                                                                                                                   |
| Financing                                           | Financing of nutrition-specific and nutrition-sensitive interventions, stability of funding for building capacity; and flexibility of funding for adaptive management decisions, innovations, and learning.                                                          |
| Monitoring and evaluation, learning, accountability | Generating evidence of learning, and impact, expanding investments from coverage monitoring to strengthen implementation research in support of scaling-up.                                                                                                          |

---

**Supplemental Table 2.** Associations between selected factors and stunting among children**0-5.9 months in India**

|                                           | 2006    |            | 2016    |             | Pooled  |             |
|-------------------------------------------|---------|------------|---------|-------------|---------|-------------|
|                                           | $\beta$ | 95% CI     | $\beta$ | 95% CI      | $\beta$ | 95% CI      |
| <b>Immediate determinants</b>             |         |            |         |             |         |             |
| Maternal low BMI (<18.5)                  | 0.05**  | 0.01,0.09  | 0.04*** | 0.02,0.06   | 0.04*** | 0.02,0.06   |
| Vegetarian                                | -0.02   | -0.06,0.02 | 0.01    | -0.01,0.03  | 0.00    | -0.01,0.02  |
| <b>Health and nutrition services</b>      |         |            |         |             |         |             |
| Health and nutrition services             | 0.01    | -0.01,0.02 | 0.00    | -0.00,0.01  | 0.00    | -0.00,0.01  |
| <b>Underlying determinants</b>            |         |            |         |             |         |             |
| Household level                           |         |            |         |             |         |             |
| Household size                            | 0.00    | -0.00,0.01 | 0.00    | -0.01,0.00  | 0.00    | -0.00,0.00  |
| SES quintile 1                            | 0.06    | -0.02,0.14 | 0.02    | -0.01,0.06  | 0.03    | -0.00,0.06  |
| SES quintile 2                            | 0.05    | -0.03,0.12 | 0.01    | -0.02,0.04  | 0.01    | -0.02,0.04  |
| SES quintile 3                            | 0.07    | -0.00,0.15 | 0.00    | -0.03,0.03  | 0.01    | -0.02,0.04  |
| SES quintile 4                            | 0.00    | -0.07,0.07 | -0.00   | -0.03,0.02  | -0.00   | -0.03,0.02  |
| Any household member has health insurance | -0.00   | -0.09,0.09 | 0.02    | -0.00,0.04  | 0.01    | -0.00,0.03  |
| Scheduled castes                          | 0.04    | -0.02,0.09 | 0.02    | -0.01,0.05  | 0.02    | -0.00,0.05  |
| Scheduled tribe                           | 0.03    | -0.04,0.10 | 0.04*   | 0.01,0.07   | 0.04**  | 0.01,0.07   |
| Other backward classes                    | 0.00    | -0.04,0.05 | 0.00    | -0.02,0.03  | 0.00    | -0.02,0.02  |
| Hindu religion                            | -0.02   | -0.11,0.06 | 0.01    | -0.03,0.05  | 0.00    | -0.03,0.04  |
| Muslim religion                           | -0.02   | -0.11,0.07 | 0.02    | -0.03,0.06  | 0.01    | -0.03,0.05  |
| Hygiene and sanitation                    |         |            |         |             |         |             |
| Hygiene score                             | -0.02   | -0.05,0.00 | -0.01** | -0.02,-0.00 | -0.01** | -0.02,-0.01 |
| Maternal level                            |         |            |         |             |         |             |
| High school (10-12)                       | 0.01    | -0.04,0.07 | -0.03** | -0.05,-0.01 | -0.02*  | -0.04,-0.00 |
| College or higher                         | 0.08    | -0.00,0.16 | -0.04** | -0.07,-0.01 | -0.03*  | -0.06,-0.00 |
| Married before 18                         | 0.01    | -0.03,0.05 | -0.02*  | -0.03,-0.00 | -0.01   | -0.03,0.00  |
| <b>Village factors</b>                    |         |            |         |             |         |             |
| % households having toilet                | 0.05    | -0.02,0.11 | 0.01    | -0.02,0.04  | 0.02    | -0.01,0.04  |
| % households having electricity           | 0.02    | -0.04,0.07 | -0.02   | -0.05,0.01  | -0.01   | -0.04,0.01  |
| Rural                                     | 0.01    | -0.04,0.06 | -0.01   | -0.03,0.01  | -0.01   | -0.03,0.01  |
| <b>Child</b>                              |         |            |         |             |         |             |
| Birth order                               | 0.00    | -0.01,0.01 | -0.00   | -0.01,0.00  | -0.00   | -0.01,0.00  |
| Boy                                       | -0.02   | -0.05,0.01 | 0.03*** | 0.02,0.05   | 0.02*** | 0.01,0.04   |

\*  $p < 0.05$ , \*\*  $p < 0.01$ , \*\*\*  $p < 0.001$
