# Supplementary material for: The role of the state government, civil society and programmes across sectors in stunting reduction in Chhattisgarh, India, 2006–2016
Source: PubMed Central journal article supplement (PMC7342433; doi:10.1136/bmjgh-2019-002274), 2020-07-06
Supplement: bmjgh-2019-002274supp002.pdf [file bmjgh-2019-002274supp002.pdf]

**Supplemental Figure 1. Factors contributing to the changes in height-for-age z-score (HAZ) in Chhattisgarh between 2006-2016<sup>1</sup>**

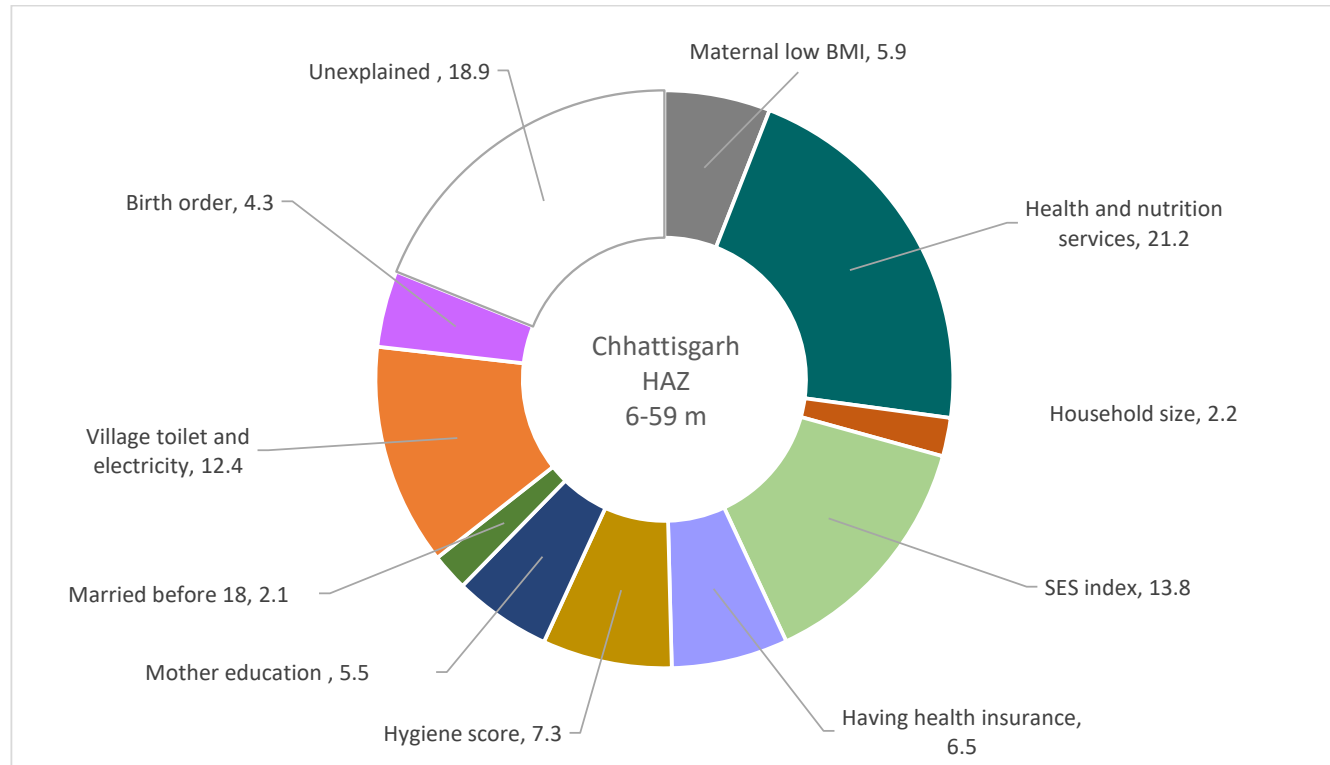

Notes: <sup>1</sup>Values are percent shares of the change
